# Supplementary material
Source: PubMed Central journal article supplement (PMC5047077)
Supplement: supp_pp.16.00536_PP2016-00536R1_Supplemental_Material.pdf [file supp_pp.16.00536_PP2016-00536R1_Supplemental_Material.pdf]

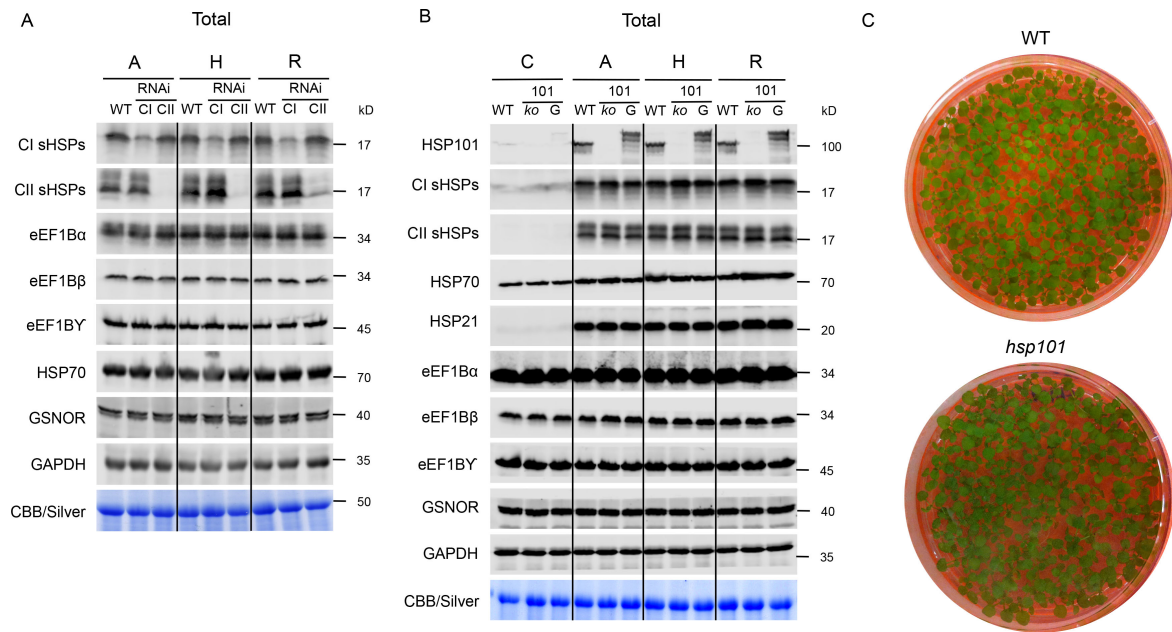

**Figure S1. Abundance of sHSP-interacting proteins remains unaltered during heat stress, and *hsp101* mutant seedlings are able to survive the heat stress treatment.**

Total protein representing an equivalent fraction of the samples used for the analysis of soluble and insoluble proteins shown in Figure 4 (A) or Figure 5 (B) was separated by SDS-PAGE and analyzed by immunoblotting with the indicated antibodies. The total amount of the proteins analyzed was not noticeably altered during the heat stress treatments. Therefore, the increase or decrease in the insoluble fraction is not due to changes in total protein abundance. C. Pictures of the seedlings were taken of the plants 5 days after the same heat stress treatment.

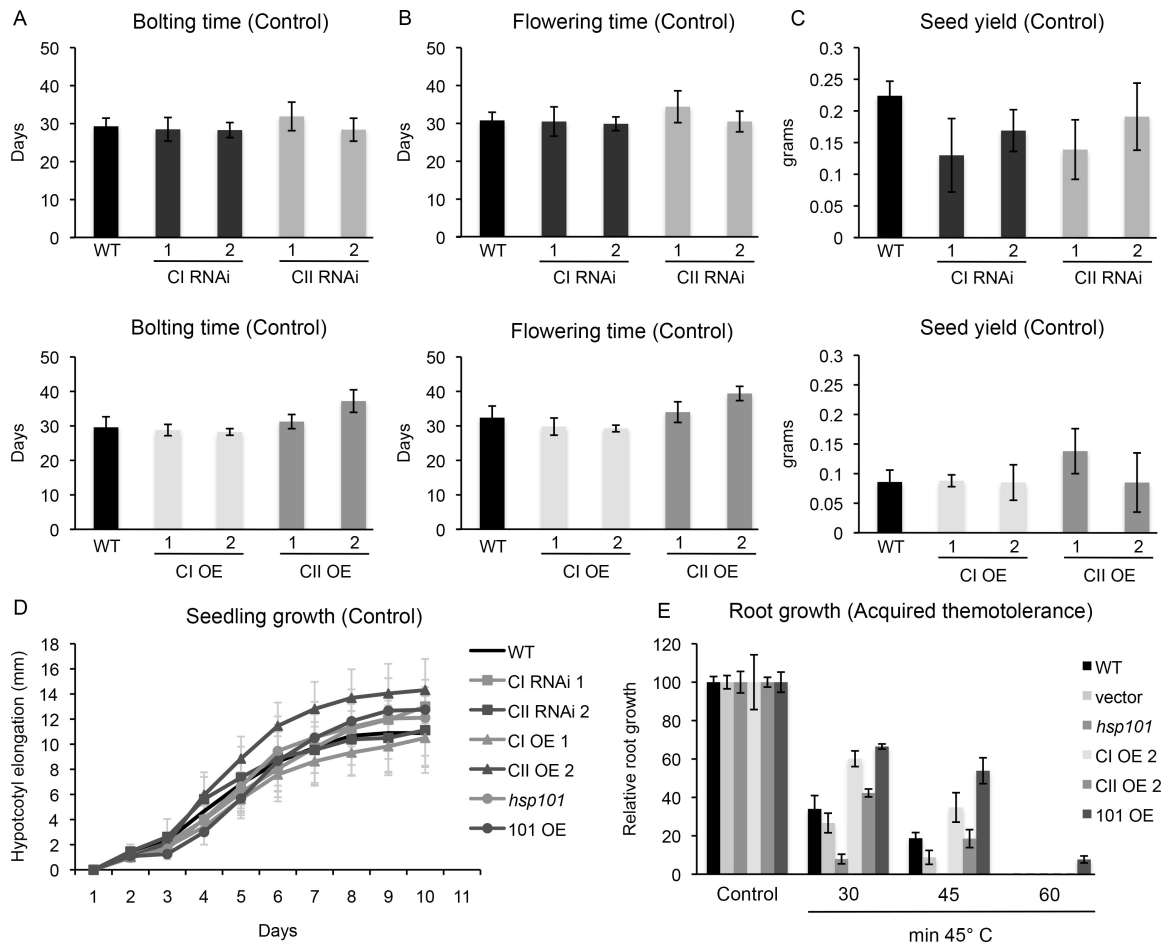

**Figure S2. CI and CII sHSP RNAi and overexpression (OE) lines develop normally under control conditions and show reduced root growth after heat stress.**

**A.** The average bolting and **B.** flowering time was determined for the same lines in long day conditions 16h light/8hrs dark, 21°C at 80  $\mu\text{mol m}^{-2} \text{s}^{-1}$ . Error bars represent the standard deviation (n=15-18). **C.** The average seed yield was weighed per plant. Error bars represent the standard deviation (n=13-15). **D.** Hypocotyl elongation of dark grown seedlings was monitored for CI and CII RNAi and overexpression lines daily for 10 days. Error bars represent the standard deviation (n=10-15). **E.** CI and CII sHSP OE lines are important for the maintenance of root growth during heat stress recovery. Seedlings were grown on plates in the light for 4 days, acclimated and heat stressed at 45°C for 30, 45 or 60 min. Seedlings were returned to 22°C and root growth after heat stress was quantified after 5 days. Root growth is normalized to growth of untreated seedlings (Control). Error bars represent the standard deviation (n=18 per line).

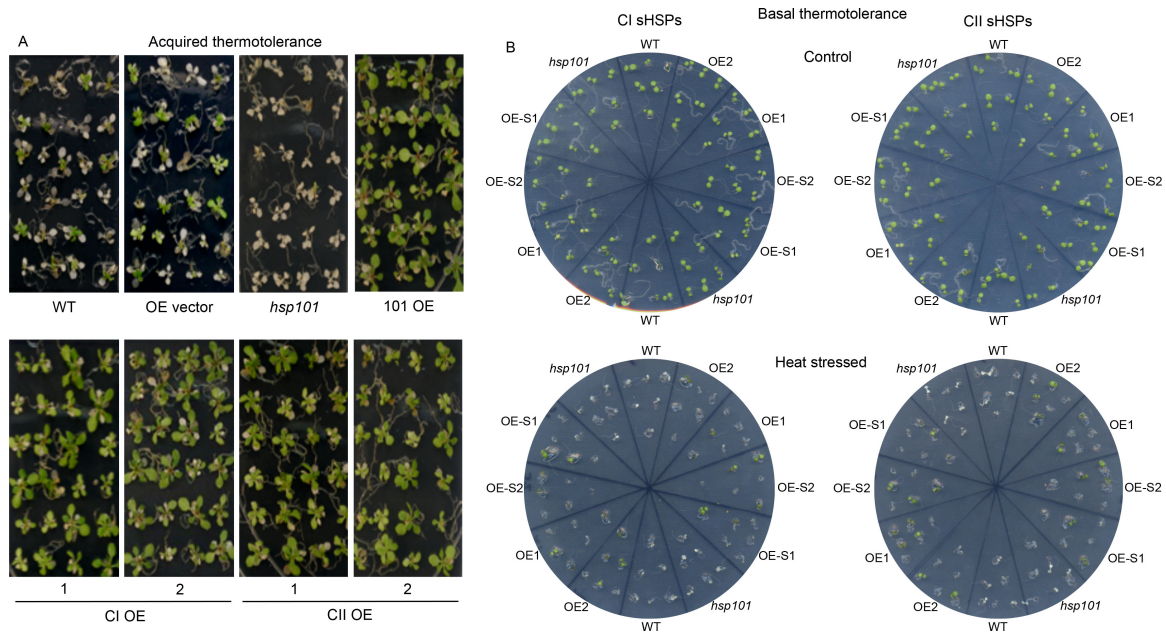

**Fig. S3. Overexpression of sHSPs increases heat stress tolerance.** **A.** Pictures of the plants used for the data graphed in Fig. 1E were taken 7 days after the heat stress treatment. **B.** Comparison of heat stress tolerance of the CI and CII OE lines with the CI-Strep and CII-Strep OE lines (OE-S1 and S2). The *hsp101* null mutant was included as an additional heat sensitive control. Arabidopsis seedlings were grown for 4 days and either maintained at 22 °C or heat stressed at 44°C for 90 min. Pictures were taken 5 days after the heat stress.

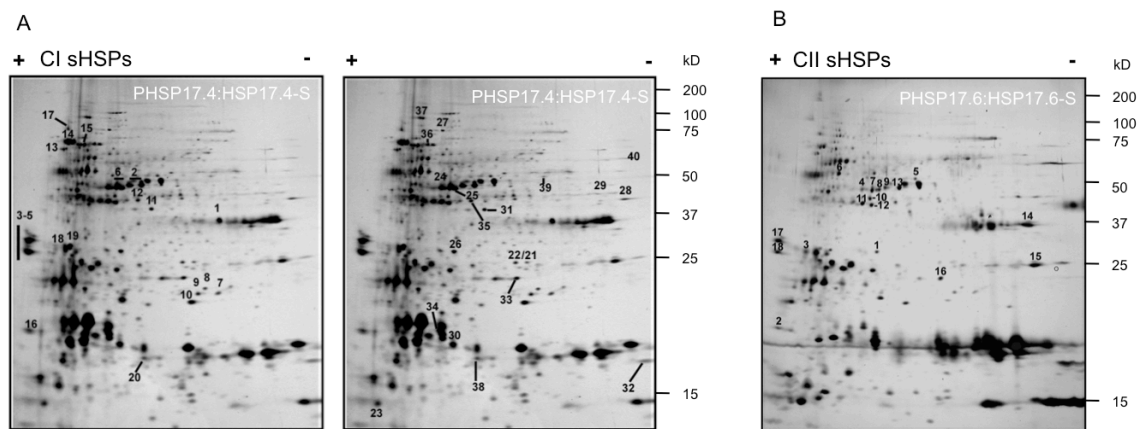

**Figure S4. sHSP-interacting proteins for which peptide data were obtained by mass spectrometry.** **A, B.** 2D-PAGE of affinity samples as shown in Figure 3 for CI (B) or CII (C) sHSPs. The numbers indicate the spots that were excised and analyzed using mass

spectrometry and that correspond to the protein identities listed in Tables S1 (for CI) and S2 (for CII).

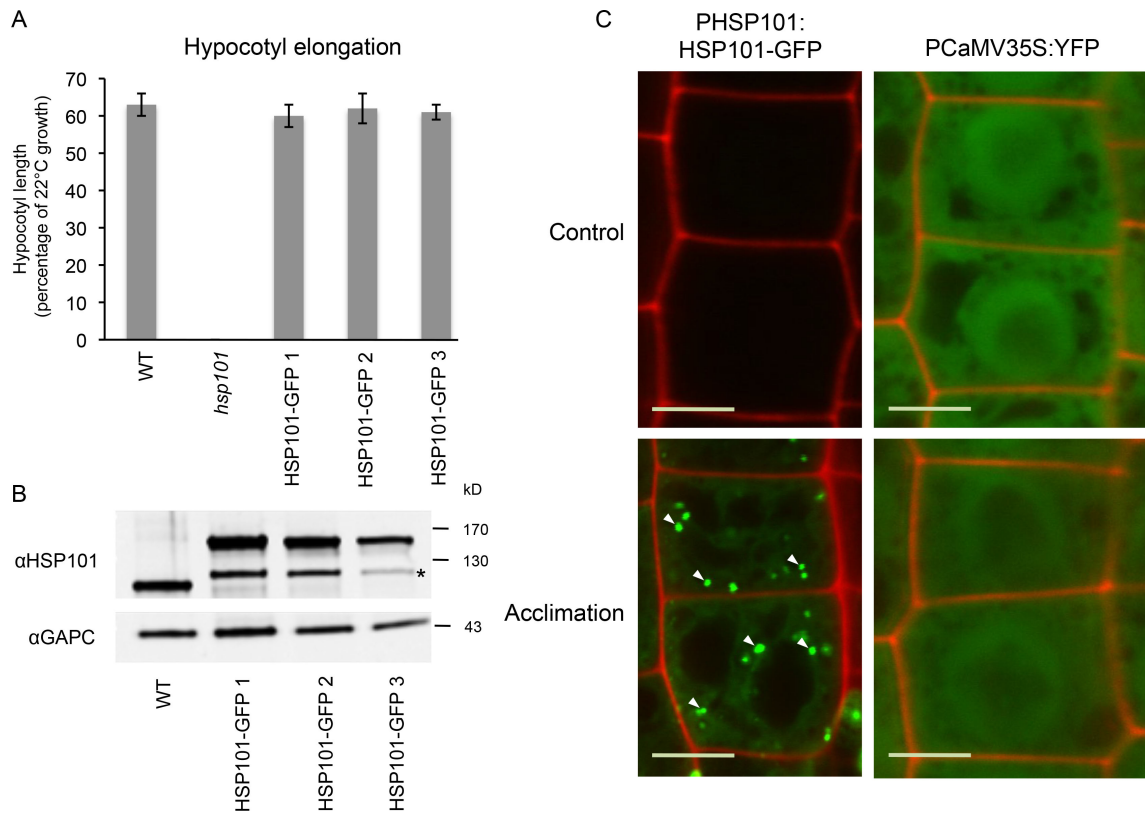

**Figure S5. PHSP101:HSP101-GFP is heat induced, complements the *hsp101* null phenotype and accumulates in cytosolic foci during heat stress. A.**

Hypocotyl elongation assays were conducted on wild type, *hsp101* and three independent PHSP101:HSP101-GFP recombinant lines. Seedlings were dark-grown for 2.5 days, acclimated (38°C, 90 min, 21°C, 2 hrs) and subsequently heat stressed at 45°C for 2hrs. Hypocotyl elongation was determined 2.5 days after the heat stress. Values are shown as percentages relative to elongation without heat treatment. Error bars indicate standard error of the mean (n=11-15). All the PHSP101:HSP101-GFP recombinant lines tested were able to rescue the wild type, heat tolerant phenotype. **B.** Wild type and HSP101-GFP transgenic plants were heat stressed as in A, and crude protein extracts isolated. Samples were separated using SDS-PAGE and immunoblot analysis was performed using an antibody directed against the HSP101 N-terminal domain. HSP101-GFP migrated at the expected size. The \* indicates a degradation product of HSP101-GFP. GAPDH was

used as a loading control. **C.** HSP101-GFP expression is induced by heat and localized to punctate structures during acclimation conditions (white arrowheads). As a control for non-specific, heat-induced localization, plants expressing free YFP (PCaMV35S:YFP) were subjected to control and acclimation (1.5hr 38°C and recovered for 2hrs at 22°C); free YFP showed no accumulation in cytosolic foci.

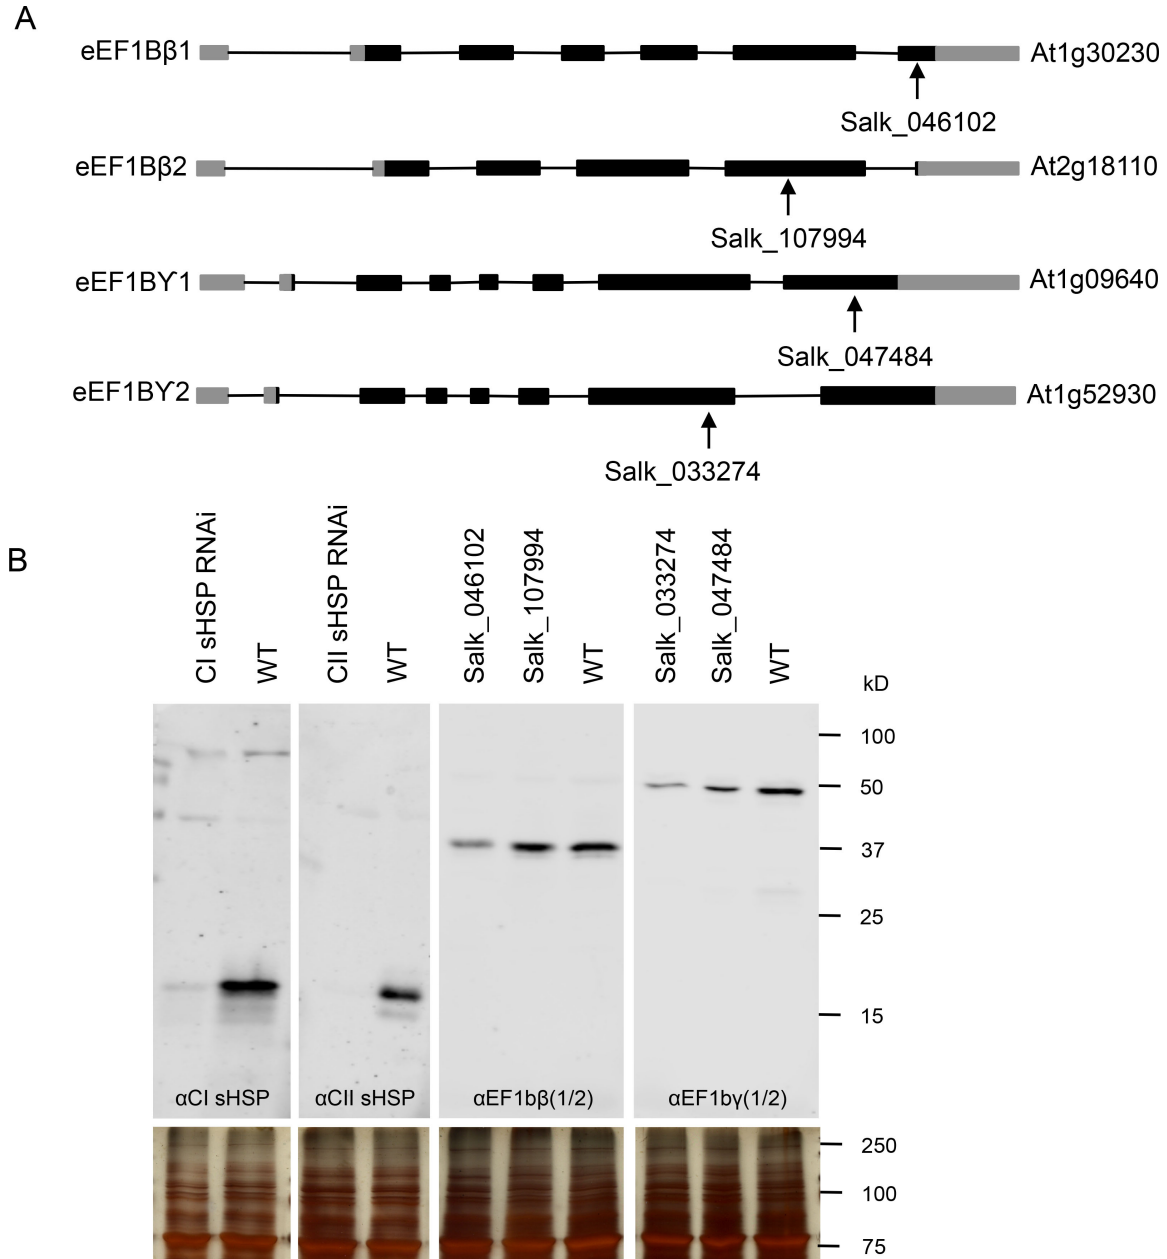

**Figure S6. Location of T-DNA insertions in eEF1Bβ1 and 2, eEF1B γ1 and 2, and the specificity of the EF1B β and γ antibodies. A.** Homozygous T-DNA insertion lines

were selected for the two isoforms of both eEF1B $\beta$  (1 and 2) and eEF1B $\gamma$  (1 and 2). UTRs are depicted in gray and introns are indicated by a line. The location of the T-DNA insertions is indicated by an arrow. **B.** CI sHSPs accumulate in cytosolic foci in the sHSP CII RNAi lines **C.** Homozygous lines were selected and grown on PNS plates together with wild type. Total proteins were extracted from heat acclimated seedlings, separated by SDS-PAGE and further processed for immunoblot analysis. The Salk lines eEF1b $\beta$ 1 and eEF1B $\gamma$ 2 both showed a reduced signal, indicating that these isoforms contribute the most to the signal observed in wild type. These mutants were used to determine the specificity of the signal observed in the immunolocalization experiments in Figure 6, Panels H and I.

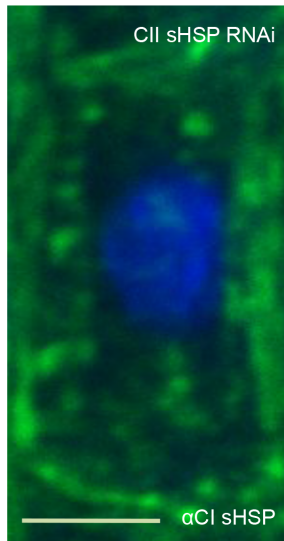

**Figure S7. CI sHSPs accumulate in punctate structures in the CII sHSP RNAi during heat stress acclimation.** Arabidopsis CII sHSP RNAi seedlings were heat acclimated (90min, 38°C and 2hrs, 21°C), fixed and processed for immunolocalization using the CI sHSP polyclonal antibody and were detected using a secondary antibody coupled to Alexa594. The image was taken in an Arabidopsis root cortex cell.

Table S1. CI sHSP-interacting proteins

|   | Protein name                                            |                                                      | PI         | MW           | AGI                    |
|---|---------------------------------------------------------|------------------------------------------------------|------------|--------------|------------------------|
| 1 | Fructose bisphosphate aldolase 8                        | K.GILAADESTGTIGK.R<br>K.EGGVLPGIK.V<br>K.AAQEALYVR.C | 6.4        | 38.5         | At3g52930              |
| 2 | Eukaryotic translation elongation factor 1B, gamma 1, 2 | K.ALIAAEYAGVK.I<br>L.AAEYAGVK.I                      | 5.4<br>5.1 | 46.4<br>46.7 | At1g57720<br>At1g09640 |

|    |                                                                                       |                                                                                                                                                                                                                            |            |              |                        |
|----|---------------------------------------------------------------------------------------|----------------------------------------------------------------------------------------------------------------------------------------------------------------------------------------------------------------------------|------------|--------------|------------------------|
|    |                                                                                       | K.IEESADFQMGVTK.S<br>K.VPVLETPEGPIFESNAIAR.Y<br>R.MGYAPFSAPAEAAISALK.R<br>A.PAEAAISALK.R<br>K.FTSAFPVER.Y<br>A.PVAEAPKPAEEEEAPKPK.A<br>K.PAEEEEAPKPK.A<br>K.YNDENMVSVTLNK.V<br>K.MLICGSEGPVK.V<br>R.VSQMIEDAEPFEGEALLDAK.C |            |              |                        |
| 3  | Eukaryotic translation elongation factor 1B, alpha 2                                  | M.AVTFSDLHTEEGVK.S<br>V.TFSDLHTEEGVK.S<br>K.TYISGDQLSVDDVK.V<br>K.VYAAVPVKPSDAFPNASK.W<br>K.WYESVASQLAK.S<br>R.GVEMPGLFWGASK.L<br>M.PGLFWGASK.L<br>R.GVEMPGLFWGASK.L                                                       | 4.2        | 24.2         | At5g19510              |
| 4  | Eukaryotic translation elongation factor 1B, beta 1                                   | F.AALAKPPTSQYVNASR.W<br>R.WYNHIDALLR.I<br>F.PNLNSDAGLK.K<br>K.SSVLIDIKPWDEETDMK.K                                                                                                                                          | 4.2        | 25.1         | At1g30230              |
| 5  | Eukaryotic translation elongation factor 1B, beta 1, 2                                | K.KLDEHLLTR.S<br>K.LDEHLLTR.S<br>R.SYITGYQASK.D<br>R.SIQMEGLFWGASK.L                                                                                                                                                       | 4.2<br>4.2 | 25.1<br>25.3 | At1g30230<br>At2g18110 |
| 6  | Eukaryotic translation initiation factor 4A-1/DEA (D/H)-box<br>RNA helicase (eIF4A-3) | K.GLDVQQAQSGTGK.T<br>K.MFVLEADEMLSR.G<br>K.RDELTLEGIK.Q<br>R.DELTLEGIK.Q<br>R.VLITDILLAR.G<br>K.GVAINFVTR.D                                                                                                                | 5.4<br>4.9 | 46.7<br>46.8 | At3g13920<br>At1g72730 |
|    | Eukaryotic translation elongation factor 1B, gamma 1                                  | K.VPVLETPEGSVFESNAIAR.Y                                                                                                                                                                                                    | 5.1        | 46.7         | At1g09640              |
|    | Eukaryotic translation initiation factor 4A-2                                         | K.GVAINFVTLDDQR.M                                                                                                                                                                                                          | 5.3        | 46.8         | At1g54270              |
| 7  | Glutathione S-transferase 11                                                          | K.VPAFEDGDFK.L                                                                                                                                                                                                             | 6.6        | 23.6         | At1g02920              |
| 8  | Glutathione S transferase phi 2                                                       | R.YENQGTNLLQTDK.N                                                                                                                                                                                                          | 6.3        | 24.1         | At4g02520              |
| 9  | Glutathione S-transferase 11                                                          | K.VPAFEDGDFK.L                                                                                                                                                                                                             | 6.6        | 23.6         | At1g02920              |
| 10 | Heat shock protein HSP23.6 (mitochondrial)                                            | K.LALEQDTLVIR.G                                                                                                                                                                                                            | 7.0        | 23.6         | At4g25200              |
| 11 | O-methyltransferase 1                                                                 | R.LLTSYSVLTCNSR.K<br>R.IYGLGPVCK.Y<br>K.NEDGVSIAALCLMNQDK.V                                                                                                                                                                | 5.8        | 39.6         | At5g54160              |
| 12 | S-adenosylmethionine synthase                                                         | K.ANVDYEQIVR.K<br>K.TQVTIEYINESGAMVPR.V<br>K.SIVASGLAR.R                                                                                                                                                                   | 5.6        | 42.8         | At3g17390              |
| 13 | Heat shock cognate protein 70.1                                                       | R.FSDSSVQSDMK.L<br>K.DAGVIAGLNVMR.I<br>R.MVNHVQEFK.R<br>R.FEELNMDLFR.K<br>K.STVHDVVLVGGSTRI.I<br>K.VQQLQDFNGK.E<br>K.NALENYAYNMR.N<br>K.ELESICNPIAK.M                                                                      | 4.7        | 71.4         | At5g02500              |
|    | Heat shock protein 70T-1                                                              | K.NQVAMNPVNTVFDAK.R                                                                                                                                                                                                        | 5.0        | 68.4         | At1g56410              |
| 14 | Heat shock protein 70                                                                 | K.NQVAMNPVNTVFDAK.R<br>K.DAGVISGLNVMR.I                                                                                                                                                                                    | 4.9        | 71.1         | At3g12580              |
| 15 | Heat shock protein 70                                                                 | K.NQVALNPQNTVFDAK.R                                                                                                                                                                                                        | 4.9        | 71.1         | At3g12580              |
| 16 | Translationally controlled tumor protein                                              | K.VVDIVDTFR.L<br>K.LSEEDQAVFK.K<br>L.SEEDQAVFK.K<br>K.EGSTNPTFLYFAH.G<br>K.EIENGILWEVEGK.W                                                                                                                                 | 4.3        | 18.9         | At3g16640              |
| 17 | Cell division cycle 48                                                                | K.LAEDVDLER.I<br><br>R.SENPEAMEEDGVDEVEIK.A<br>K.YQAFQTLQQR.G                                                                                                                                                              | 4.9        | 89.4         | At3g09840              |

|    |                                                                                       |                                                                                                                                                                                                |            |              |                        |
|----|---------------------------------------------------------------------------------------|------------------------------------------------------------------------------------------------------------------------------------------------------------------------------------------------|------------|--------------|------------------------|
| 18 | Plasma-membrane associated cation-binding protein 1                                   | K.KEEATPAPAVVETPVKEPETTTTAPVA<br>EPPKP.                                                                                                                                                        | 4.7        | 24.6         | At4g20260              |
| 19 | Plasma-membrane associated cation-binding protein 1                                   | K.KEEATPAPAVVETPVK.E                                                                                                                                                                           | 4.7        | 24.6         | At4g20260              |
| 20 | Eukaryotic elongation factor 5A-2                                                     | K.LPTDDGLTAQMR.L                                                                                                                                                                               | 5.8        | 17.1         | At1g26630              |
| 21 | Vacuolar H <sup>+</sup> -ATPase subunit E isoform 3                                   | K.IDYSMQLNASR.I                                                                                                                                                                                | 6.3        | 26.1         | At4g11150              |
|    | Vacuolar H <sup>+</sup> -ATPase subunit E isoform 1                                   | K.VLQAQDDIVNAMK.D                                                                                                                                                                              | 6.1        | 27.1         | At1g64200              |
| 22 | Nucleotide-rhamnose synthase/epimerase-reductase                                      | K.LCEAQQITYTYGSGR.L<br>K.NYENVCTLR.V                                                                                                                                                           | 5.8        | 33.6         | At1g63000              |
| 23 | Profilin 2                                                                            | K.PAEIAGINK.D<br>K.YMVVQGEAGAVIR.G                                                                                                                                                             | 4.7        | 14.0         | At4g29350              |
| 24 | Eukaryotic translation initiation factor 1B, gamma 1                                  | Y.SAPAEEGAISTLK.R<br>K.EAPVAEAPK.L<br>K.LAEEDAEAPKPK.A<br>K.VPVLETPEGSVFESNAIAR.Y                                                                                                              | 5.1        | 46.7         | At1g09640              |
| 25 | Eukaryotic translation initiation factor 4A-1/DEA (D/H)-box<br>RNA helicase (eIF4A-3) | K.GLDDVIQQAQSGTGK.T<br>K.MFVLDEADEMLSR.G<br>K.GVAINFVTR.D<br>K.RDELTLEGIK.Q<br>R.DELTLEGIK.Q<br>R.VLITDILLAR.G                                                                                 | 5.4<br>4.9 | 46.7<br>46.8 | At3g13920<br>At1g72730 |
|    | Eukaryotic translation elongation factor 1B, gamma chain                              | K.VPVLETPEGSVFESNAIAR.Y                                                                                                                                                                        | 5.1        | 46.7         | At1g09640              |
|    | Eukaryotic translation initiation factor 4A-2                                         | K.GVAINFVTLDDQR.M                                                                                                                                                                              | 5.3        | 46.8         | At1g54270              |
| 26 | Jacalin-related lectin 30                                                             | K.VYVQQAQDGISAVK.F<br>K.SPEEVTGEEHGK.S<br>K.IFGSDGSVITMLR.F<br>K.GANLWDDGSTHDAVTK.I<br>Y.FAPLTTTTPLTPAK.Q                                                                                      | 5.6        | 32.2         | At3g16420              |
| 27 | Jacalin-related lectin 34                                                             | K.LEAQGNSTGGTSWDDGSDYDGVTK.I<br>N.STGGTSWDDGSDYDGVTK.I<br>K.IYASYGGEIGIYVK.F<br>K.LTAEGGETGAVWDDGSHDDVK.K<br>K.VYVQQAQDGVAAVK.F<br>K.NGSQVVFVGDGR.G<br>Y.LAPSGTTPLTPATQSQK.L<br>K.FGVHVAPITK.- | 5.2        | 72.5         | At3g16460              |
| 28 | Aminoacyl synthase complex-interacting multifunctional<br>protein 1 (ARC1)            | K.ITPGLYTDENGVAITYK.G                                                                                                                                                                          | 7.5        | 42.1         | At2g40660              |
| 29 | Cyclase associated protein 1 (CAP1)                                                   | K.IGGPVLDVTK.I<br>K.DSLETAITTA.S                                                                                                                                                               | 6.6        | 51.0         | At4g34490              |
| 30 | Heat shock protein 17.6 (CII)                                                         | R.KFQLPDNADLEK.I                                                                                                                                                                               | 5.4        | 17.7         | At5g12030              |
| 31 | O-methyltransferase 1                                                                 | K.DAILDGGIPFNK.A<br>R.LLTSYSVLTCSNR.K<br>R.IYGLGPVCK.Y<br>K.NEDGVSIAALCLMNQDK.V                                                                                                                | 5.8        | 39.6         | At5g54160              |
| 32 | Cytosolic cyclophilin ROC1                                                            | K.VYFDMTIDGQPAGR.I                                                                                                                                                                             | 8.0        | 18.4         | At4g38740              |
| 33 | Ascorbate peroxidase 1                                                                | K.DIVALSGAHTLGR.C<br>K.EGLLQLVSDK.A                                                                                                                                                            | 6.0        | 27.6         | At1g07890              |
| 34 | HSP17.4 (CI)                                                                          | K.VEVEDGNILQISGER.S<br>K.ASMENGVLSVTVPK.V                                                                                                                                                      | 4.9        | 17.4         | At3g46230              |
| 35 | S-adenosylmethionine synthase                                                         | K.ANVDYEQIVR.K<br>R.FVIGGPHGDAGLTGR.K                                                                                                                                                          | 5.6        | 42.8         | At3g17390              |
| 36 | FK506 binding protein 62                                                              | K.TDEEQVVDGLDR.A                                                                                                                                                                               | 5.0        | 61.5         | At3g25230              |
| 37 | Cell division cycle 48                                                                | R.LDDVGYDDVGGVVR.K<br>K.LAEDVDLER.I<br>R.SENPEAMEEDGVDEVESEIK.A<br>K.YQAFQAQTLQQR.G                                                                                                            | 4.9        | 89.4         | At3g09840              |
| 38 | Eukaryotic elongation factor 5A-2                                                     | K.LPTDDGLTAQMR.L                                                                                                                                                                               | 5.8        | 17.1         | At1g26630              |
| 39 | GTP-binding protein                                                                   | K.IGIVGLPNVGK.S<br>R.DLETITEELR.L<br>K.PVVYLINLNER.D                                                                                                                                           | 6.8        | 44.5         | At1g30580              |
| 40 | 3-methylcrotonyl-CoA carboxylase                                                      | R.IGIMGGAQAAGVLTQIER.A                                                                                                                                                                         | 8.7        | 64.0         | At4g34030              |



Table S2. CII sHSP interacting proteins

|    | Protein name                                              |                                                                                                                                                                                                          | PI  | MW   | ACC       |
|----|-----------------------------------------------------------|----------------------------------------------------------------------------------------------------------------------------------------------------------------------------------------------------------|-----|------|-----------|
| 1  | Jacalin-related lectin 30                                 | K.VYVGOAQDGISAVK.F<br>K.IFGSDGSVITMLR.F                                                                                                                                                                  | 5.6 | 32.2 | At3g16420 |
| 2  | Translationally controlled tumor protein                  | K.LSEEDQAVFK.K<br>K.VVDIVDTFR.L<br>K.EGSTNPTFLYFAH.G                                                                                                                                                     | 4.3 | 18.9 | At3g16640 |
| 3  | DNA-damage-repair/toleration protein 112 (chloroplast)    | A.IEVLLGGGDGSLAFIPNDFSIK.G                                                                                                                                                                               | 4.8 | 17.0 | At1g20340 |
| 4  | DEA (D/H)-box RNA helicase (eIF4A-3)                      | K.GLDVIQQAQSGTGK.T<br>K.MFVLDEADEMLSR.G                                                                                                                                                                  | 4.9 | 46.8 | At1g72730 |
| 5  | S-Adenosyl-L-homocysteinase                               | K.AGIIVLAEGR.L                                                                                                                                                                                           | 5.8 | 53.4 | At4g13940 |
| 6  | ATPase alpha subunit (chloroplast)                        | R.ADEISNIIR.E<br>K.IAQIPVSEAYLGR.V<br>I.PVSEAYLGR.V<br>R.VINALANPIDGR.G<br>R.LIESPAPGHSR.R<br>K.ASSVAQVVTSLQER.G<br>R.EQHTLIHYDDLK.Q<br>R.EAYPGDVVYLHSR.L<br>K.TNKPQFQEIHASTK.T<br>K.TLTAEAESFLK.E       | 4.9 | 55.3 | AtCg00120 |
| 7  | Eukaryotic translation initiation factor 4A-1             | R.GIYAYGFEK.P<br>K.IQVGVFSATMPPEALEITR.K<br>R.GIYAYGFEKPSAIQQR.G<br>R.ALGDYLGVK.A<br>K.MFVLDEADEMLSR.G<br>K.RDELTLEGIK.Q<br>R.VLITDLLAR.G                                                                | 5.3 | 49.9 | At3g13920 |
|    | Eukaryotic translation initiation factor 4A-2             | R.KGVAINFVTLDDQR.M                                                                                                                                                                                       | 5.3 | 46.8 | At1g54270 |
| 8  | Eukaryotic translation elongation factor 1B, gamma 2      | R.VSQMIEDAEPFEGEALLDAK.C                                                                                                                                                                                 | 5.4 | 46.4 | At1g57720 |
| 9  | Eukaryotic translation elongation factor 1B, gamma 2      | K.ALIAAEYAGVK.I<br>K.IEESADFQMGVTLNK.S<br>K.YNDENMVSVFVTLNK.V<br>R.VSQMIEDAEPFEGEALLDAK.C                                                                                                                | 5.4 | 46.4 | At1g57720 |
| 10 | RAB GTPase homolog E1b                                    | K.KYDEIDAAPEER.A<br>R.GITINTATVEYETENR.H<br>K.QVGVPMVVFVFLNK.E<br>K.VGETVDLVGLR.E<br>R.SYTVTGVEMFQK.I<br>K.ILDEALAGDNVGLLLR.G                                                                            | 6.1 | 51.6 | At4g20360 |
| 11 | Actin 8                                                   | R.IAPEEHPVLLTEAPLNPK.A<br>K.LSFVAVDYEQEMETSK.T<br>K.AEYDEAGPGIVHR.K<br>R.DLTDYLMK.I                                                                                                                      | 5.3 | 41.9 | At1g49240 |
|    | Actin 7                                                   | R.TTGIVLDSDGDVSH.T<br>R.GYMFTTTAER.E                                                                                                                                                                     | 5.2 | 41.7 | At5g09810 |
| 12 | 11 results                                                |                                                                                                                                                                                                          |     |      |           |
| 13 | Eukaryotic translation elongation factor 1B, gamma 2      | K.ALIAAEYAGVK.I<br>K.IEESADFQMGVTLNK.S<br>K.VPVLETPEGPIFESNAIAR.Y<br>A.PAEEAAISALK.R<br>K.FTSAPPHVER.Y<br>K.AAPVAEAPKPAEEEEAPKPK.A<br>K.YNDENMVSVFVTLNK.V<br>K.MLICGSEGPVK.V<br>R.VSQMIEDAEPFEGEALLDAK.C | 5.4 | 46.4 | At1g57720 |
| 14 | Glyceraldehyde-3-phosphate dehydrogenase C subunit (GapC) | K.DAPMFVVGNEHEYK.S<br>R.AASFNIHPSSTGAAK.A<br>R.VVDLIVHMSK.A                                                                                                                                              | 7.1 | 36.9 | AT3g04120 |
| 15 | BCCP-like protein 3                                       | K.SSTTTISDGSSDASVSDGKK.T<br>K.VGDFEMNLK.R                                                                                                                                                                | 9.0 | 29.6 | AT3g56130 |
| 16 | Ascorbate peroxidase 1                                    | K.DIVALSGAHTLGR.C                                                                                                                                                                                        | 6.0 | 27.6 | At1g07890 |
| 17 | Eukaryotic translation elongation factor 1B, beta 2       | R.SIQMEGLFWGASK.L                                                                                                                                                                                        | 4.2 | 25.3 | At2g18110 |
| 18 | Eukaryotic translation elongation factor 1B, alpha 2      | M.AVTFSDLHTEEGVK.S<br>K.TYISGDQLSVDDVK.V<br>K.VYAAVPVKPSDAFPNASK.W                                                                                                                                       | 4.2 | 24.2 | At5g19510 |

Table S3 CI/CII sHSP interacting proteins of which the orthologues are present in stress granules in *S. cerevisiae* and human cells.

| CI spot            | CII spot     | Protein ID                                                                  | AGI                                 | Heat induction (mRNA) | Yeast                              | Yeast stress granules                                                                                               | Human                                                         | Human stress granules      |
|--------------------|--------------|-----------------------------------------------------------------------------|-------------------------------------|-----------------------|------------------------------------|---------------------------------------------------------------------------------------------------------------------|---------------------------------------------------------------|----------------------------|
| 2<br>6<br>24<br>25 | 8<br>9<br>13 | Eukaryotic translation elongation factor 1B, gamma chain                    | At1g09640<br>At1g57720              | No<br>No              | YKL081W<br>TEF4<br>EFC1            | Jain <i>et al.</i> 2016<br>Cherkasov <i>et al.</i> 2015<br>Wallace <i>et al.</i> 2015                               | EEF1G<br>EF1G<br>GIG35                                        | Not detected               |
| 3<br>4<br>5        | 17<br>18     | Eukaryotic translation elongation factor 1B, alpha, beta                    | At1g30230<br>At2g18110<br>At5g19510 | 2x<br>2x<br><1.5x     | YAL003W<br>TEF5<br>EFB1            | Cherkasov <i>et al.</i> 2015                                                                                        | EEF1B                                                         | Not detected               |
| 6, 25              | 4<br>7       | Eukaryotic translation initiation factor 4A1/4A2/DEA (D/H)-box RNA helicase | At1g54270<br>At1g72730<br>At3g13920 | No<br>No<br>No        | YKR059W<br>TIF1<br>YJL138C<br>TIF2 | Jain <i>et al.</i> 2016                                                                                             | EIF4A2<br>BM-010<br>DDX2B<br>EIF4A3                           | Jain <i>et al.</i> 2016    |
| 12<br>35           | -            | S-adenosylmethionine synthase                                               | At3g17390                           | 0.5x                  | YLR180W<br>YDR502C                 | Jain <i>et al.</i> 2016                                                                                             | SAMS1<br>MAT1A<br>SAMS2<br>MAT2A                              | Not detected               |
| 13<br>14<br>15     | 1D*          | Heat shock cognate protein 70/70.1/70T-1                                    | At1g56410<br>At3g12580<br>At5g02500 | No<br>10x<br>2x       | SSA1-4<br>SSB2                     | Walters <i>et al.</i> 2015<br>Jain <i>et al.</i> 2016<br>(SSA3,SSB2)<br>Cherkasov <i>et al.</i> 2015<br>(SSA1,SSA2) | HSPA1AB<br>HSPA2,6,8                                          | Not detected               |
| 16                 | 2            | Translationally controlled tumor protein                                    | At3g16640                           | No                    | YKL056C<br>TMA19<br>MMI1           | Jain <i>et al.</i> 2016<br>Cherkasov <i>et al.</i> 2015<br>Rinnerthaler <i>et al.</i> 2013                          | TPT1<br>HRF<br>TCTP                                           | Jain <i>et al.</i> 2016    |
| 17<br>37           | -            | Cell division cycle 48                                                      | At3g09840                           | <2x                   | YDL126C<br>CDC48                   | Not detected                                                                                                        | VCP<br>CDC48<br>p97                                           | Jain <i>et al.</i> 2016    |
| 20<br>38           | -            | Eukaryotic initiation factor 5A-2                                           | At1g26630                           | No                    | YEL034<br>HYP2<br>TIF51A           | Cherkasov <i>et al.</i> 2015                                                                                        | EIF5A2                                                        | Not detected               |
| 21                 | -            | V-type H <sup>+</sup> -transporting ATPase subunit E                        | At4g11150                           | No                    | YOR332W<br>VMA4                    | Jain <i>et al.</i> 2016 **                                                                                          | ATP6E1<br>VMA4                                                | Not detected               |
| 23                 | -            | Profilin 2                                                                  | At4g29350                           | No                    | YOR122C<br>PFY1<br>CLS5<br>PRF1    | Figley <i>et al.</i> 2014                                                                                           | PFN<br>PFN2                                                   | Jain <i>et al.</i> 2016*** |
| 28                 | -            | Aminoacyl synthase complex-interacting multifunctional protein 1 (ARC1)     | At2g40660                           | No                    | YGL105W<br>ARC1                    | Jain <i>et al.</i> 2016<br>Cherkasov <i>et al.</i> 2015<br>Wallace <i>et al.</i> 2015                               | AIMP1<br>EMAP2<br>EMAPII<br>HLD3<br>SCYE1<br>p43              | Not detected               |
| 32                 | -            | Cytosolic cyclophilin ROC1                                                  | At4g38740                           | <2x                   | YDR155C<br>CPR1<br>CPH1<br>CYP1    | Cherkasov <i>et al.</i> 2015                                                                                        | PIPF<br>CYP3                                                  | Not detected               |
| 36                 | -            | FK506 binding protein 62                                                    | At3g25230                           | 8x                    | YNL135C<br>FPR1<br>FKB1<br>RBP1    | Cherkasov <i>et al.</i> 2015                                                                                        | FKBP4<br>FKBP51<br>FKBP52<br>FKBP59<br>HBI<br>Hsp56<br>Pplase | Not detected               |
| 39                 | -            | GTP-binding protein                                                         | At1g30580                           | No                    | YBR025C<br>OLA1<br>YHL014C<br>YLF2 | Cherkasov <i>et al.</i> 2015<br>Wallace <i>et al.</i> 2015                                                          | OLA1<br>DOC45<br>GBP45<br>GTBP9                               | Not detected               |

\*Identified in a 1D CII sHSP-affinity gel

\*\*Not Detected; VMA2, subunit of same ATPase detected

\*\*\*PFN2 was detected

Table S4 Percentage insoluble proteins of an independent experiment

| % insoluble   | Acclimation |    |     |               | Heat stressed |    |     |               | Recovery |    |     |               |
|---------------|-------------|----|-----|---------------|---------------|----|-----|---------------|----------|----|-----|---------------|
|               | WT          | CI | CII | <i>hsp101</i> | WT            | CI | CII | <i>hsp101</i> | WT       | CI | CII | <i>hsp101</i> |
| CI sHSPs      | 1           |    | 3   | 9             | 47            |    | 45  | 46            | 13       |    | 51  | 80            |
| CII sHSPs     | 2           | 4  |     | 5             | 6             | 10 |     | 28            | 3        | 9  |     | 8             |
| HSP101        | 2           | 2  | 2   |               | 4             | 4  | 5   |               | 5        | 5  | 6   |               |
| HSP70         | 14          | 18 | 16  | 35            | 44            | 45 | 45  | 42            | 30       | 37 | 38  | 38            |
| eEF1ba        | 9           | 18 | 16  | 32            | 57            | 63 | 61  | 65            | 38       | 60 | 43  | 55            |
| eEF1B $\beta$ | 4           | 4  | 5   | 29            | 64            | 65 | 61  | 59            | 26       | 42 | 33  | 53            |
| eEF1By        | 0           | 3  | 3   | 26            | 69            | 72 | 72  | 76            | 41       | 55 | 50  | 66            |
| GSNOR         | 19          | 18 | 19  | 21            | 73            | 70 | 59  | 68            | 67       | 66 | 58  | 56            |
| GAPDH         | 1           | 1  | 0   | 0             | 0             | 0  | 0   | 0             | 0        | 2  | 2   | 2             |

Table S5 Primers

|    |                                           |                                        |
|----|-------------------------------------------|----------------------------------------|
| 1  | Gen. HSP17.4I-Strep F                     | TCGAAAAATAAGAGGAACTCTGAAGTTG           |
| 2  | Gen. HSP17.4I-Strep R                     | ACTGCGGGTGGCTCCAACCAGAGATATCAATGGACTTG |
| 3  | OE HSP17.4I-Strep F                       | CATTCGAAGAGAATTCTAG                    |
| 4  | OE HSP17.4I-Strep R                       | CAACGAGATCTGTGATTAC                    |
| 5  | Gen. 17.6II F                             | GTCGCTTAAGTTTGTGTTGTGATCGTG            |
| 6  | Gen. 17.6II R                             | GAAGTCAACGTTGATATCCATACTGATG           |
| 7  | Gen. 17.6-II strep F                      | TCGAAAAATGAGTTCGTTTTGGTGATTGTGTG       |
| 8  | OE 17.6II strep F                         | TCGAAAAATGAGTTTGTGTTTTCTAGAGTCCGC      |
| 9  | Gen. 17.6-II strep R<br>OE17.6-II strep R | ACTGCGGGTGGCTCCAAGCAACTTGAAGTTGAATTGTC |
| 10 | Ds17.4-I F                                | GGACTAGTGCGCGCCAGAGTAAGCGAAACGATGTC    |
| 11 | Ds17.4-I R                                | CGGGATCCATTTAAATCAGAGTTCCTCTTAACCAGAGA |
| 12 | Ds17.6-II F                               | GGACTAGTGCGCGCCAATGGATTTAGGAAGTTTTCC   |
| 13 | Ds17.6-II R                               | CGGGATCCATTTAAATCCAACACACAATCACAAAACAA |
| 14 | GFP F                                     | GGCTCGAGATGAGTAAAGGAGAAGAA             |
| 15 | GFP R                                     | TCTCTAGATTATTTGTATAGTTCATCCATGC        |
| 16 | eEF1B $\alpha$ 1CDS F                     | AAAAAAACATATGGCGGTTACATTTTCTGATCTCC    |
| 17 | eEF1B $\alpha$ 1CDS R                     | AAAAAAAGGATCCCTAAATCTTGTTAAAAGCG       |
| 18 | eEF1B $\beta$ 1CDS F                      | AAAAAAACATATGGCAGCATTCCCTAACCTTAAC     |
| 19 | eEF1B $\beta$ 1CDS R                      | AAAAAAACTCGAGCTACAAAAACTTGGGAAACTG     |
| 20 | eEF1B $\gamma$ 1CDS F                     | AAAAAAACATATGGCTTTGGTCTTGACACAG        |
| 21 | eEF1B $\gamma$ 1CDS R                     | AAAAAAACTCGAGTCACTTGAAGCACTTGGCGTC     |
| 22 | Salk_046102 F                             | CCTTTGTGCTTAACCTCGATTGAG               |
| 23 | Salk_046102 R                             | GTTGACTTTTTCGGAGAGGAG                  |
| 24 | Salk_107994 F                             | AAGTCATCTCCATTCCCATT                   |
| 25 | Salk_107994 R                             | TGCTGAAGAGAGAGCAGCTTC                  |
| 26 | Salk_047484 F                             | TCAATCAAGGCAAAAATTACCG                 |
| 27 | Salk_047484 R                             | GTCCCTCCTATTGCTTCCAAG                  |
| 28 | Salk_033274 F                             | TTCACTTAAAGCATTGGCG                    |
| 29 | Salk_033274 R                             | GGCAATTTCTGCATTGAAGAG                  |
| 30 | Salk_BP                                   | TGGTTCACGTAGTGGGCCATCG                 |
